# Supplementary material for: Andrographolide Exhibits Anticancer Activity against Breast Cancer Cells (MCF-7 and MDA-MB-231 Cells) through Suppressing Cell Proliferation and Inducing Cell Apoptosis via Inactivation of ER-α Receptor and PI3K/AKT/mTOR Signaling
Source: MDPI journal article supplement (doi:10.3390/molecules27113544), 2022-05-31

## Supplementary Material

### Andrographolide exhibits anticancer activity against breast cancer cells (MCF-7 and MDA-MB-231 cells) through suppressing cell proliferation and inducing cell apoptosis via inactivation of ER- $\alpha$ receptor and PI3K/AKT/mTOR signaling

Ruhaineer Tohkayomatee<sup>1</sup>, Somrudee Reabroi<sup>1</sup>, Duangjai Tungmunthum<sup>2</sup>, Warisara Parichatikanond<sup>3,4</sup>, and Darawan Pinthong<sup>1,\*</sup>

<sup>1</sup>Department of Pharmacology, Faculty of Science, Mahidol University, Bangkok 10400, Thailand; ruhaineer.t@pnu.ac.th (R.T.); somrudee.rea@mahidol.ac.th (S.R.); darawan.pin@mahidol.edu (D.P.)

<sup>2</sup>Department of Pharmaceutical Botany, Faculty of Pharmacy, Mahidol University, Bangkok 10400, Thailand; duangjai.tun@mahidol.ac.th (D.T.)

<sup>3</sup>Department of Pharmacology, Faculty of Pharmacy, Mahidol University, Bangkok 10400, Thailand; warisara.par@mahidol.ac.th (W.P.)

<sup>4</sup>Center of Biopharmaceutical Science of Healthy Ageing, Faculty of Pharmacy, Mahidol University, Bangkok, 10400 Thailand.

**Table S1.** Lists of primer sequences used for qRT-PCR

| Gene                          | Sequences (5'-3')      |                      |
|-------------------------------|------------------------|----------------------|
|                               | Forward                | Reverse              |
| Bcl-2                         | GGATAACGGAGGCTGGGATG   | GGGCCAAACTGAGCAGAGTC |
| Bax                           | ACATGGAGCTGCAGAGGATG   | CCAGTTGAAGTTGCCGTCAG |
| ER $\alpha$                   | TGGGAATGATGAAAGGTGGGAT | CTCATGTCTCCAGCAGACCC |
| ER $\beta$                    | CATCTCCTCCCAGCAGCAAT   | TCCATGCCCTTGTTACTCGC |
| GAPDH                         | GACAGTCAGCCGCATCTTCT   | ACCAAATCCGTTGACTCCGA |
| Mature miRNA sequence (5'-3') |                        |                      |
| miR-21-5p                     | UAGCUUAUCAGACUGAUGUUGA |                      |

**Figure S1.** Full-length blots representing the protein expression of Bcl-2, Bax, and  $\beta$ -actin as shown in Figure 3E of the manuscript.

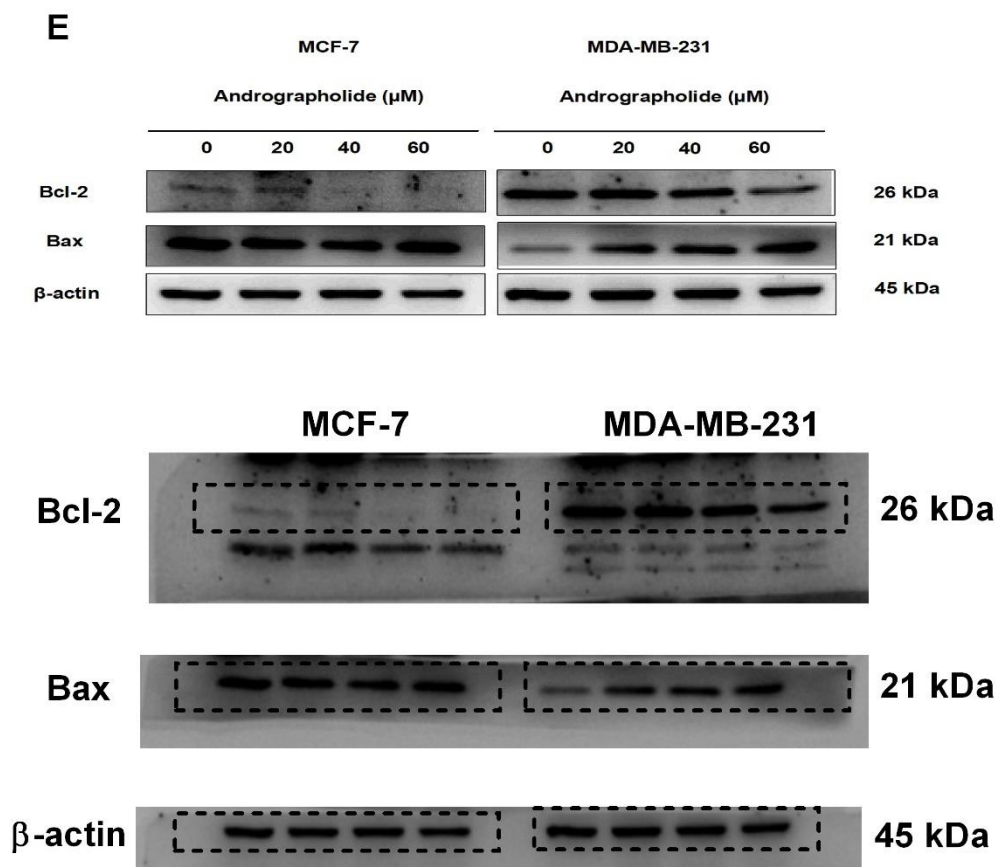

**Figure S2.** Full-length blots representing the protein expression of Bcl-2, Bax, and  $\beta$ -actin as shown in Figure 4A of the manuscript.

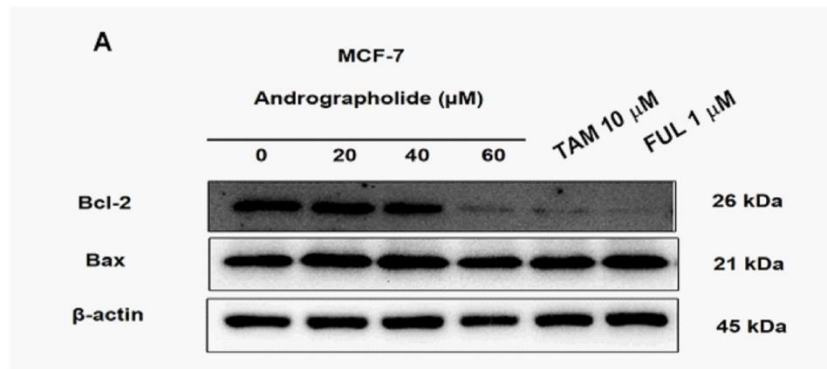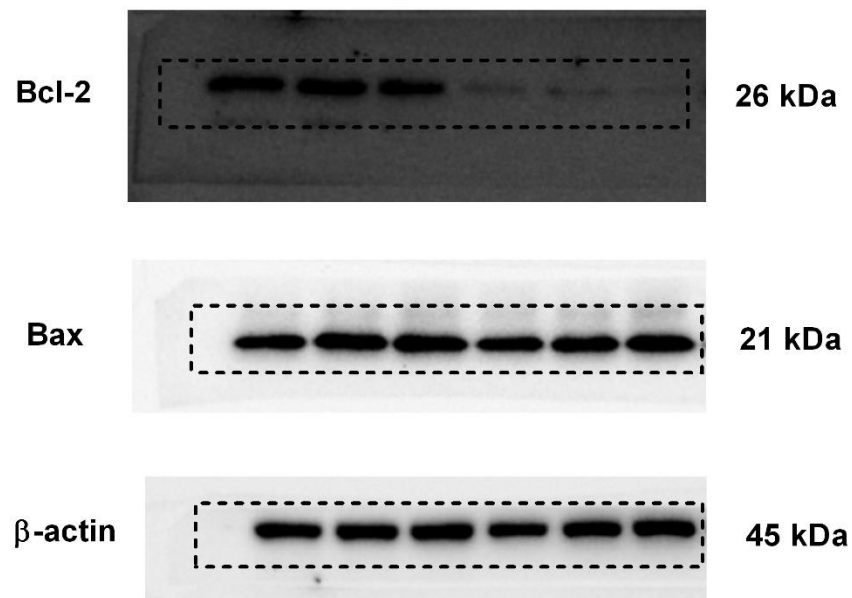

**Figure S3.** Full-length blots representing the protein expression of ER $\alpha$ , ER $\beta$ , and  $\beta$ -actin as shown in Figure 5D and 5H of the manuscript, respectively.

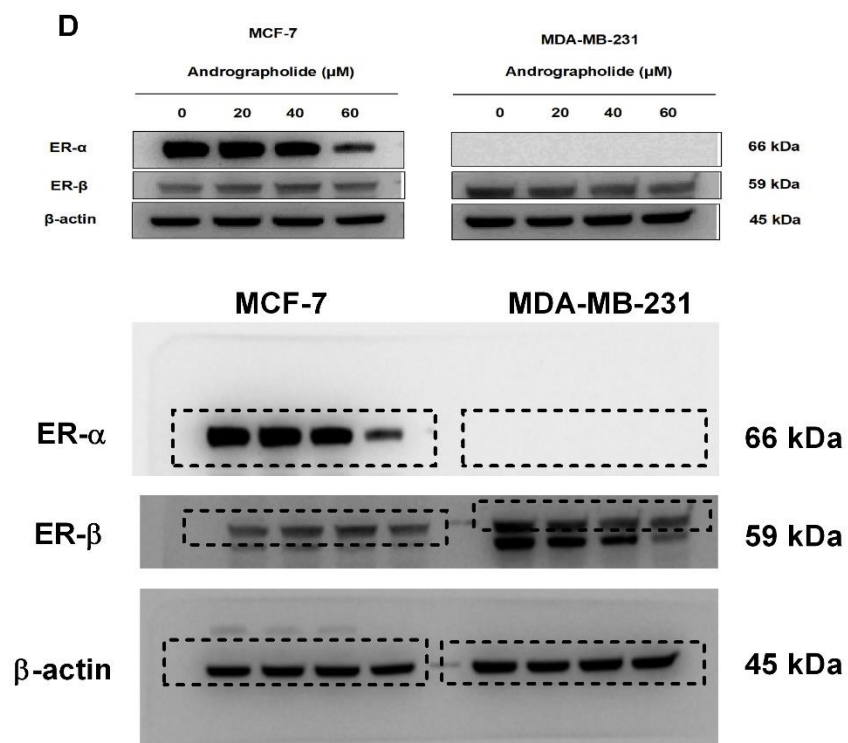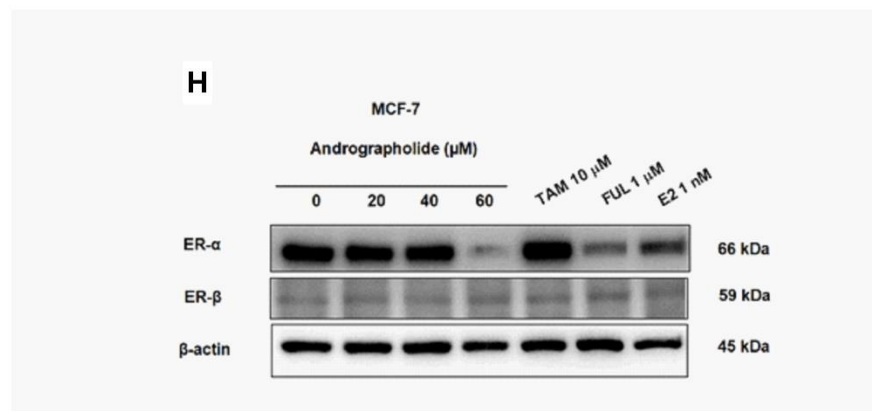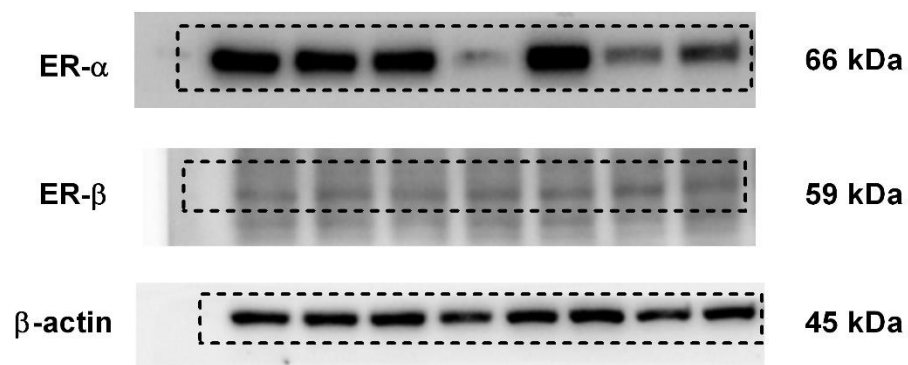

**Figure S4.** Full-length blots representing the protein expression of PI3K, AKT, p-AKT(T308), p-AKT(Ser473), mTOR, p-mTOR, and  $\beta$ -actin as shown in Figure 6A of the manuscript.

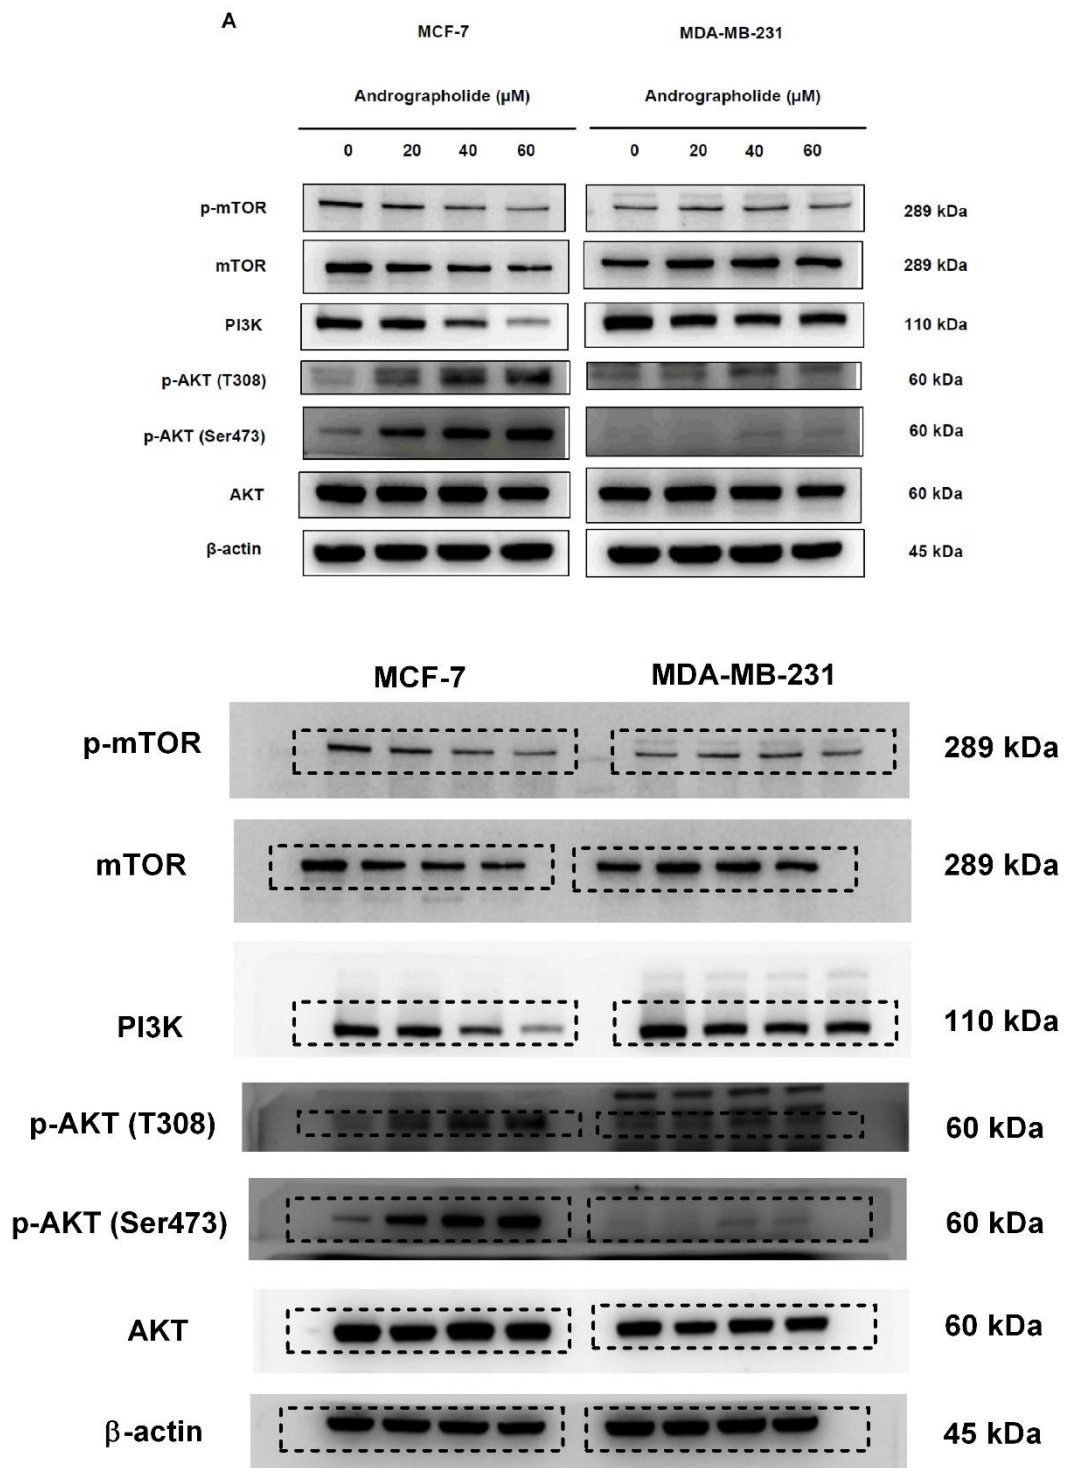

**Figure S5.** Full-length blots representing the protein expression of PI3K, mTOR, p-mTOR, and  $\beta$ -actin as shown in Figure 6J of the manuscript.

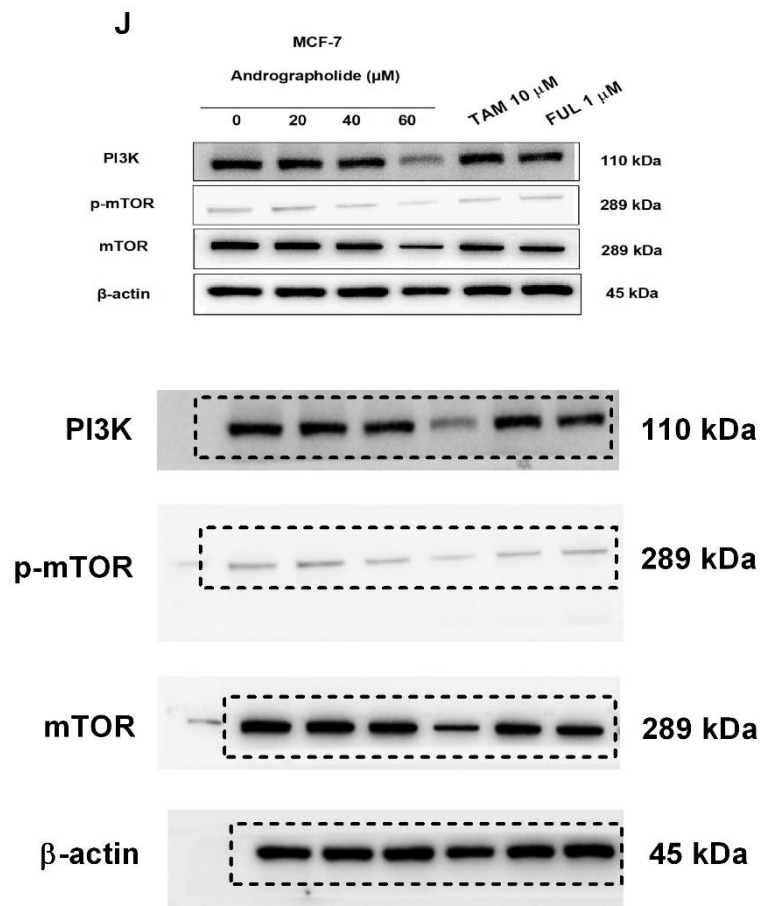

**Figure S6.** Full-length blots representing the protein expression of PI3K, mTOR, p-mTOR, and  $\beta$ -actin as shown in Figure 7A and 7C of the manuscript, respectively.

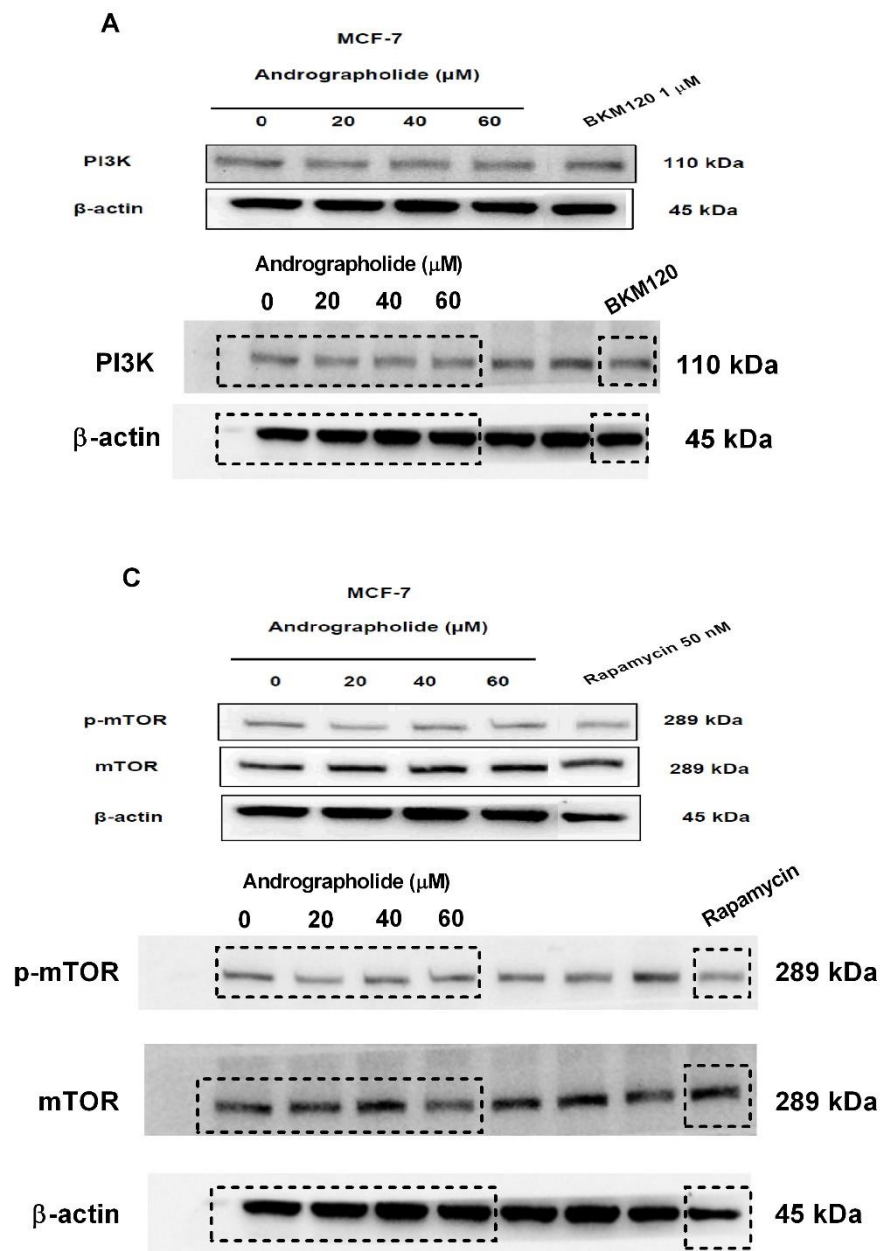





**Figure S8.** Chemical structure of andrographolide

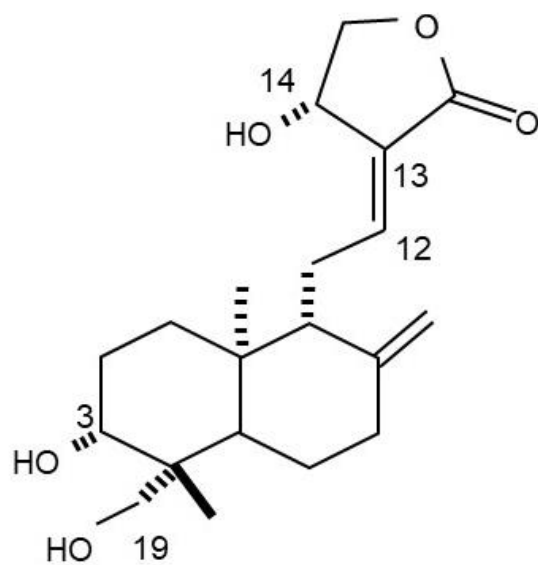

Supplement: s1 [file s1]
